# Supplementary material for: Data to Decisions: Methods to Create Neighbourhood Built Environment Indicators Relevant for Early Childhood Development
Source: Int J Environ Res Public Health. 2022 May 3;19(9):5549. doi: 10.3390/ijerph19095549 (PMC9102076; doi:10.3390/ijerph19095549)
Supplement: Supplementary file 1 [file ijerph-19-05549-s001.zip › ijerph-1651942-supplementary.pdf]

**Supplementary Material Table S1. Built environment data sources**

| Custodian                                             | Year | Data source description                                                                                                                | Purpose                                                                                                                                                                            |
|-------------------------------------------------------|------|----------------------------------------------------------------------------------------------------------------------------------------|------------------------------------------------------------------------------------------------------------------------------------------------------------------------------------|
| <b>Department of Education, Skills and Employment</b> | 2015 | <a href="#">Australian Early Development Census</a>                                                                                    | Child development data, child demographics including data relating to geography derived using publicly available ABS sources (SEIFA-IRSD of child's SA1, ASGS remoteness category) |
| <b>ABS</b>                                            | 2016 | Census of population and housing, customised data report                                                                               | Housing affordability                                                                                                                                                              |
|                                                       | 2016 | <a href="#">ASGS Volume 1 geopackage</a>                                                                                               | Mesh Block, SA1, SA2, SA3, SA4, GCCSA boundaries                                                                                                                                   |
|                                                       | 2016 | <a href="#">Mesh Block dwelling and person counts</a>                                                                                  | Dwellings                                                                                                                                                                          |
|                                                       | 2016 | <a href="#">Mesh Block - Suburb linkage csv</a>                                                                                        | Suburb                                                                                                                                                                             |
|                                                       | 2016 | <a href="#">Mesh Block - LGA linkage csv</a>                                                                                           | LGA                                                                                                                                                                                |
|                                                       | 2016 | <a href="#">SA1 urban centres and localities linkage</a>                                                                               | Section of State                                                                                                                                                                   |
|                                                       | 2016 | <a href="#">ASGS Volume 3 geopackage</a>                                                                                               | Suburb and LGA geometries                                                                                                                                                          |
|                                                       | 2016 | <a href="#">ASGS Volume 4 geopackage</a>                                                                                               | Significant Urban Area geometries                                                                                                                                                  |
|                                                       | 2016 | <a href="#">SEIFA IRSD 2011 (SA1)</a>                                                                                                  | IRSD related statistics                                                                                                                                                            |
| <b>OpenStreetMap</b>                                  |      | <a href="#">Retrieved 1 October 2018</a>                                                                                               |                                                                                                                                                                                    |
|                                                       | 2018 | Pedestrian network, generated using OSMnx, using Overpass API using hybrid walk-cycle network                                          | Accessibility analysis                                                                                                                                                             |
|                                                       | 2018 | Intersections, generated using OSMnx with processed pedestrian network                                                                 | Modelling street connectivity                                                                                                                                                      |
|                                                       | 2018 | Destinations (see definitions, elsewhere)                                                                                              | Accessibility analysis                                                                                                                                                             |
|                                                       | 2018 | Open Space (see definitions, elsewhere)                                                                                                | Accessibility analysis                                                                                                                                                             |
| <b>ACECQA</b>                                         | 2019 | <a href="#">Australian Children's Education &amp; Care Quality Authority child care centres (geocoded)</a>                             | Accessibility analysis                                                                                                                                                             |
| <b>ACARA</b>                                          | 2019 | <a href="#">Australian Curriculum, Assessment and Reporting Authority (ACARA), Primary and secondary schools, by sector (geocoded)</a> | Accessibility analysis                                                                                                                                                             |

|                                 |      |                                                                                                                                                            |                                      |
|---------------------------------|------|------------------------------------------------------------------------------------------------------------------------------------------------------------|--------------------------------------|
| <b>NHSD</b>                     | 2017 | <a href="#">National Health Services Directory (via AURIN Portal)</a>                                                                                      | Accessibility analysis               |
| <b>Pitney Bowes</b>             | 2014 | Convenience stores                                                                                                                                         | Accessibility analysis               |
| <b>Pitney Bowes</b>             | 2014 | Newsagencies                                                                                                                                               | Accessibility analysis               |
| <b>Pitney Bowes</b>             | 2014 | Petrol stations                                                                                                                                            | Accessibility analysis               |
| <b>HLC</b>                      | 2017 | Additional geocoded datasets curated by Health Liveable Cities group from multiple sources (supermarket major chains, 2017; Australian Libraries, 2016-18) | Accessibility analysis               |
| <b>PSMA</b>                     | 2017 | Transport and Topography                                                                                                                                   | Traffic exposure                     |
| <b>State Transport agencies</b> | 2018 | GTFS feed data covering the period 8 October to 5 December for 2018                                                                                        | Accessibility and transport analysis |

**Key:** ABS: Australian Bureau of Statistics. ACECQA: Australian Children's Education & Care Quality Authority. ASGS: Australian Standard Geography Structure. GCCSA: Greater Capital City Statistical Area. GTFS: General Transit Feed Specification. HLC: Healthy Liveable Cities Group (RMIT). LGA: Local Government Authority. NHSD: National Health Services Directory. SA1: Statistical Area Level 1; SA2: Statistical Area Level 2; Statistical Area Level 3; SA4: Statistical Area Level 4. SEIFA-IRSD: Socio-Economic Index For Areas – Index of Relative Socio-Economic Disadvantage.
